# Supplementary material
Source: Research Square preprint supplement (doi:10.21203/rs.3.rs-9748132/v1)
Supplement: Supplementary file 1 [file 0aec64abfd1199c2af464795.docx]

**Table 1** Characteristics of included systematic reviews and meta-analyses

| First author's name, publication year | Study design  (Number of databases searched) | Confounders adjusted or discussed  *(focusing on women only? YES/NO/UNCLEAR)* | Number of primary studies included2  (total number of participants) | Work sector (number of corresponding study) | Design of primary studies (number of corresponding study) | ROBIS (risk of bias) |
| --- | --- | --- | --- | --- | --- | --- |
| Megdal, 2005 | SR with MA  (1) | Length of follow-up, year of publication, race, menopausal status, whether data were collected prospectively or retrospectively, and whether adjustment for confounding was complete or not. *(YES)* | 13  (259573) | flight attendants (7), nurses (3), radio and telegraph operators (1), various (1), not specified (1) | case-control study (1), cohort study (10), nested case-control study (2) | HIGH |
| Erren, 2008 | SR with MA  (2) | N/A. *(YES)* | 19  (>280481)* | flight attendants (12), nurses (3), radio and telegraph operators (1), not specified (3) | case-control study (8), cohort study (11) | HIGH |
| Kolstad, 2008 | SR  (2) | age, alcohol, BMI, hormonal exposition, length of night work, lifestyle and socioeconomic status, light at night at home and latitude of residence, menopausal status, smoking. *(UNCLEAR)* | 8  (214459) | nurses (3), radio and telegraph operators (1), various (4) | case–control study (3), cohort study (3), nested case–control study (2) | HIGH |
| Wang, 2013 | SR with MA  (5) | N/A. *(YES)* | 10  (277675) | female military employees (1), nurses (5), various (4) | case-control study (4), cohort study (3), nested case-control study (3) | HIGH |
| Jia, 2013 | SR with MA  (4) | age, age at first birth, alcohol, age at menarche, benign breast diseases, BMI or related, education, family history of breast cancer, hormone therapy, oral contraceptive use, parity, smoking. *(YES)* | 13  (192440) | female military employees (1), nurses (4), radio and telegraph operators (1), not specified (7) | case-control study (8), cohort study (5) | HIGH |
| Ijaz, 2013 | SR with MA  (7) | age, BMI, ethnicity, parity (with adjustment for number of children or age at first child), socioeconomic status. *(YES)* | 16  (1444881) | female military employees (1), nurses (5), radio and telegraph operators (1), textile factory workers (1), not specified (8) | case-control study (4), cohort study (5), nested case-control study (7) | LOW |
| Kamdar, 2013 | SR with MA  (5) | N/A. *(YES)* | 15  (1448540) | flight attendants (3), ship radio and telegraph operators (1), nurses (4), textile workers (1), not specified (6) | case-control study (10), cohort study (5) | LOW |
| He, 2015 | SR with MA  (1) | age, age at menarche, alcohol consumption, BMI, family history of breast cancer, hormone therapy, parity (e.g., number of children and age at the first birth), smoking. (YES) | 18  (1488251) | Flight attendants (3), N/A (15) | case-control study (7), cohort study (6), nested case-control study (5) | HIGH |
| Benabu, 2015 | SR  (1) | age at first pregnancy, alcohol consumption, familial history, parity. (YES) | 19  (1745476) | female military employees (1), nurses (5), radio and telegraph operators (1), textile factory workers (1), various (11) | Case-control study (12), cohort study (7) | HIGH |
| Lin, 2015 | SR with MA  (2) | age, age at first birth, age at menarche/menopause, BMI, education, family history, menopausal status, number of pregnancies, parity, race, smoking status. (UNCLEAR) | 6  (NA) | Nurses (3), not specified (3) | cohort study (6) | HIGH |
| Nikpour, 2015 | SR  (3) | age, age at birth of first child, age at menarche, using contraception drugs. (YES) | 16  (296561) | female military employees (1), nurses (5), radio and telegraph operators (1), textile workers (1), not specified (8) | case-control study (11), cohort study (5) | HIGH |
| Travis, 2016 | SR with MA  (3) | N/A. (YES) | 10  (1400000) | nurses (2), textile workers (1), not specified (7) | cohort study (10) | HIGH |
| McElvenny, 2017 | SR  (N/A) | age, alcohol consumption, physical exercise, multivitamin use, menopausal status, post-menopausal hormone use, physical examination in the previous two years, healthy eating score, smoking status, pack-years of smoking and BMI. (UNCLEAR) | 10  (N/A) | textile workers (1), not specified (9) | case-control study (5), cohort study (5) | HIGH |
| Salamanca-Fernández, 2018 | SR  (5) | age, alcohol, pre/post-menopausal status, smoke. (UNCLEAR) | 26  (2908094) | female military employees (1), nurses (7), public sector female workers (1), textile workers (1), various (16) | case-control study (10), cohort study (10), nested case-control study (6) | HIGH |
| Liu, 2018 | SR with MA  (3) | N/A. *(UNCLEAR)* | 26  (>40040)* | Industry (3), nurses (6), not specified (17), | case-control study (12), cohort study (9), nested case-control study (5) | HIGH |
| Dun, 2020 | SR with MA  (3) | N/A. *(UNCLEAR)* | 26  (1714518) | employed women (1), female military employees (1), nurses (5), textile workers (1), not specified (18) | case-control study (13), cohort study (9), nested case-control study (4) | HIGH |
| Fagundo-Rivera, 2020 | SR  (7) | N/A. *(UNCLEAR)* | 10  ( > 201152)* | nurses (10) | case-control study (2), cross-sectional study (5), nested case-control study (3) | HIGH |
| Schwarz, 2021 | SR with MA  (3) | age, age at first birth or number of children, BMI in postmenopausal women, family history of breast cancer, hormone replacement therapy, menopausal status. Additional covariables: alcohol intake, oral contraception, age at menarche, age at menopause, breastfeeding, physical activity, history of benign breast disease, and education/socioeconomic status. *(YES)* | 18  (>11928)* | female military employees (1), nurses (5), textile workers (1), various (11) | case-control study (5), cohort study (8), nested case-control study (5) | LOW |
| Van, 2021 | SR with MA  (2) | N/A. *(YES)* | 32  (2462697) | female military employees (1), nurses (5), textile workers (1), not specified (25) | case-control study (13), cohort study (15), nested case-control study (4) | HIGH |
| Manouchehri, 2021 | SR with MA  (4) | N/A. *(YES)* | 26  (1313348) | military employees (1), flight attendants (2), nurses (4), radio and telegraph operators (1), textile workers (1), various (17) | case-control study (13), cohort study (7), nested case-control study (6) | LOW |
| Wei, 2022 | SR with MA  (4) | N/A. *(YES)* | 17  (9380015) | nurses (6), not specified (11) | cohort study (17) | HIGH |
| Hong, 2022 | SR with MA  (4) | age, alcohol consumption, BMI, family history of BC, hormone replacement therapy (HRT), physical activity, reproductive factors, smoking, total energy intake. *(YES)* | 33  (4331782) | electromagnetic field workers (1), female military employees (1), flight attendants (1), nurses (5), telecommunications broadcast workers (1), textile workers (1), not specified (23) | case-control study (22), cohort study (10), cross-sectional study (1) | HIGH |
| Moon, 2024 | SR with MA  (3) | various potential confounders, not detailed. *(YES)* | 28  (>57075)* | female military employees (1), nurses (4), not specified (23) | case-control study (16), cohort study (12) | HIGH |

BMI = body mass index; SR = systematic review; MA = meta-analysis, N/A = not available; *Some primary studies do not indicate the number of participants.
